# Supplementary material for: Protocol for a systematic review and qualitative synthesis of information quality frameworks in eHealth
Source: PubMed Central journal article supplement — BMJ Open. 2019 Mar 5;9(3):e024722. doi: 10.1136/bmjopen-2018-024722 (PMC6429947; doi:10.1136/bmjopen-2018-024722), 2019-03-05
Supplement: bmjopen-2018-024722.draft_revisions.pdf [file bmjopen-2018-024722.draft_revisions.pdf]

# BMJ Open

BMJ Open is committed to open peer review. As part of this commitment we make the peer review history of every article we publish publicly available.

When an article is published we post the peer reviewers' comments and the authors' responses online. We also post the versions of the paper that were used during peer review. These are the versions that the peer review comments apply to.

The versions of the paper that follow are the versions that were submitted during the peer review process. They are not the versions of record or the final published versions. They should not be cited or distributed as the published version of this manuscript.

BMJ Open is an open access journal and the full, final, typeset and author-corrected version of record of the manuscript is available on our site with no access controls, subscription charges or pay-per-view fees (<http://bmjopen.bmj.com>).

If you have any questions on BMJ Open's open peer review process please email [editorial.bmjopen@bmj.com](mailto:editorial.bmjopen@bmj.com)

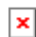

## Protocol for a Systematic Review and Qualitative Synthesis of Information Quality Frameworks in eHealth

|                               |                                                                                                                                                                                                                                                                                                                                                                                                                                                                                                                                                                                                                                                                                                                                                                                                                                                                                                                     |
|-------------------------------|---------------------------------------------------------------------------------------------------------------------------------------------------------------------------------------------------------------------------------------------------------------------------------------------------------------------------------------------------------------------------------------------------------------------------------------------------------------------------------------------------------------------------------------------------------------------------------------------------------------------------------------------------------------------------------------------------------------------------------------------------------------------------------------------------------------------------------------------------------------------------------------------------------------------|
| Journal:                      | <i>BMJ Open</i>                                                                                                                                                                                                                                                                                                                                                                                                                                                                                                                                                                                                                                                                                                                                                                                                                                                                                                     |
| Manuscript ID                 | bmjopen-2018-024722                                                                                                                                                                                                                                                                                                                                                                                                                                                                                                                                                                                                                                                                                                                                                                                                                                                                                                 |
| Article Type:                 | Protocol                                                                                                                                                                                                                                                                                                                                                                                                                                                                                                                                                                                                                                                                                                                                                                                                                                                                                                            |
| Date Submitted by the Author: | 11-Jun-2018                                                                                                                                                                                                                                                                                                                                                                                                                                                                                                                                                                                                                                                                                                                                                                                                                                                                                                         |
| Complete List of Authors:     | <p>Fadahunsi, Kayode; Imperial College London, Department of Primary Care and Public Health; Federal Ministry of Health, Hospital Services Akinlua, James; University College London, Department of Primary Care and Population Health</p> <p>O'Connor, Siobhan; Edinburgh Napier University, School of Health and Social Care</p> <p>Wark, Petra; Imperial College London, Department of Primary Care and Public Health; Coventry University, Centre for Innovative Research Across the Life Course, Faculty of Health and Life Sciences,</p> <p>Gallagher, Joseph; University College Dublin, gHealth Research Group</p> <p>Carroll, Christopher; University of Sheffield, School of Health and Related Research (SchARR)</p> <p>Majeed, Azeem; Imperial College, Department of Primary Care and Public Health</p> <p>O'Donoghue, John; Imperial College London, Department of Primary Care and Public Health</p> |
| Keywords:                     | <p>Health informatics &lt; BIOTECHNOLOGY &amp; BIOINFORMATICS, Telemedicine &lt; BIOTECHNOLOGY &amp; BIOINFORMATICS, Protocols &amp; guidelines &lt; HEALTH SERVICES ADMINISTRATION &amp; MANAGEMENT, Quality in health care &lt; HEALTH SERVICES ADMINISTRATION &amp; MANAGEMENT</p>                                                                                                                                                                                                                                                                                                                                                                                                                                                                                                                                                                                                                               |
|                               |                                                                                                                                                                                                                                                                                                                                                                                                                                                                                                                                                                                                                                                                                                                                                                                                                                                                                                                     |

SCHOLARONE™  
Manuscripts

# Protocol for a Systematic Review and Qualitative Synthesis of Information Quality Frameworks in eHealth

Kayode Philip Fadahunsi,<sup>1,2</sup> James Tosin Akinlua,<sup>3</sup> Siobhan O'Connor,<sup>4</sup> Petra A Wark,<sup>1,5</sup>  
Joseph Gallagher,<sup>6</sup> Christopher Carroll,<sup>7</sup> Azeem Majeed,<sup>1</sup> John O'Donoghue<sup>1\*</sup>

1. Department of Primary Care and Public Health, Imperial College London, United Kingdom.
2. Department of Hospital Services, Federal Ministry of Health, Abuja, Nigeria.
3. Department of Primary Care and Population Health, University College London, United Kingdom.
4. School of Health and Social Care, Edinburgh Napier University, Edinburgh, United Kingdom.
5. Centre for Innovative Research Across the Life Course, Faculty of Health and Life Sciences, Coventry University, Coventry, United Kingdom.
6. gHealth Research Group, School of Medicine, University College Dublin, Ireland.
7. Health Economics and Decision Science, School of Health and Related Research, The University of Sheffield, United Kingdom.

\*Corresponding Author

John O'Donoghue

Global eHealth Unit, Department of Primary Care and Public Health, Imperial College  
London,

The Reynolds Building, St. Dunstan's Road, London W6 8RP, United Kingdom.

j.odonoghue@imperial.ac.uk

1  
2  
3 **Word Count:** 1789  
4

5 **ABSTRACT**  
6  
7

8 **Introduction:** Electronic health (eHealth) has evolved to become a very large repository of  
9  
10 health information which informs critical decisions relating to the diagnosis, treatment and  
11  
12 prognosis of patients. Poor information quality (IQ) within eHealth may compromise patient  
13  
14 safety. Evaluation of IQ in eHealth is therefore necessary to promote patient safety. An IQ  
15  
16 framework specifies what aspects of information to evaluate and how to conduct the  
17  
18 assessment. This systematic review aims to identify, define and harmonise dimensions within  
19  
20 existing IQ frameworks in eHealth and develop a new IQ framework for assessment of  
21  
22 eHealth.  
23  
24

25 **Method and Analysis:** We will search EMBASE, Medline, PubMed, Cumulative Index to  
26  
27 Nursing and Allied Health Literature (CINAHL), Maternity and Infant Care, PsychINFO,  
28  
29 Global Health, Scopus, ProQuest Dissertations and Theses Global, Health Management  
30  
31 Information Consortium and reference lists of relevant publications for articles published in  
32  
33 English until 14th December 2016. Studies will be selected by two independent reviewers  
34  
35 using eligibility criteria based on the BeHeMoTh (**B**ehaviour/phenomenon of interest, **H**ealth  
36  
37 context and **M**odel/**T**heory) procedure. Two reviewers will independently extract data in each  
38  
39 eligible study using a pre-piloted Microsoft Excel data extraction form. Thematic synthesis  
40  
41 will be employed to define and harmonise dimensions within IQ frameworks in the selected  
42  
43 studies and develop a new IQ framework for eHealth.  
44  
45  
46

47 **Ethics and Dissemination:** Ethical approval is not required for this systematic review as  
48  
49 primary data will not be collected. The result of the review will be disseminated through  
50  
51 publication in an academic journal and scientific conferences.  
52  
53

54 **Keywords:** Quality in healthcare, health informatics, telemedicine, protocol & guidelines  
55

56 **Review Registration:** PROSPERO CRD42018097142  
57

### Strengths and limitations of this study

- This study will contribute an evidence-based framework for assessing information quality in eHealth.
- The protocol is based on PRISMA-P guidelines.
- We used the BeHeMoTh (**B**ehaviour, **H**ealth Context, **M**odel/**T**heory) procedure to develop the search strategy
- Generation of analytical themes from descriptive themes is often influenced by the insights and judgement of the reviewers

## INTRODUCTION

Electronic health (eHealth) is regarded as a modern driver of universal health coverage and quality healthcare delivery (1). Telemedicine, Electronic Health Records (EHRs), Clinical Decision Support Systems (CDSS), Mobile Health (mHealth), Computerised Physician Order Entry (CPOE), Electronic Prescribing Systems (EPS) and Web-based Health Services (WHS) have all recorded varying levels of success in promoting access to quality health services (2-3). Over time, eHealth, defined as the use of information and communication technologies in healthcare, has evolved to become a large repository of health information which informs critical decisions relating to the diagnosis, treatment and prognosis of patients (1,4). Against the backdrop of its increasing adoption, there are concerns that poor information quality (IQ) in eHealth may compromise patient safety (5-6). A number of patient safety problems associated with poor IQ in eHealth have been reported in the United Kingdom and the United States of America (7-8). These problems are classified as human factors, which are predominantly data entry errors; and technical factors, which are majorly IQ issues such as incorrect, partial and/or delayed information output (7-8). For example, incomplete information by CPOE led to medication overdose and subsequent acute renal failure in a patient (7). Evaluation of IQ in eHealth is therefore necessary to promote patient safety.

IQ describes the extent to which information is fit for purpose (9). Each dimension of IQ describes an aspect of information (10-11). For example, completeness is the extent to which data is sufficient for the task at hand; and timeliness is the extent to which up-to-date data is available when needed (12). An IQ framework is a systematic integration of IQ dimensions for the purpose of evaluating a specific information system (9,11). An IQ framework traditionally specifies what aspects of information to assess and how to conduct the assessment (10-11). An IQ framework also depicts relationship existing among IQ dimensions by categorising them (12). However, some frameworks only conceptualise IQ

1  
2  
3 without providing guidance on its assessment (9,11). A number of IQ frameworks have been  
4  
5 developed to evaluate different types of health information systems (13). For example, one  
6  
7 IQ framework for EHR comprises eleven IQ dimensions including accuracy, confidentiality,  
8  
9 interpretability amongst others which are grouped into information, security and  
10  
11 communication categories (12). However, IQ frameworks for newer types of eHealth, such  
12  
13 as the mHealth apps, are virtually non-existent (14-15). Also, there is no consensus on IQ  
14  
15 dimensions that are relevant to eHealth and their definition. It is therefore necessary to  
16  
17 harmonise IQ dimensions by synthesising the definition of dimensions within existing IQ  
18  
19 frameworks in eHealth. Identification and definition of IQ dimensions are the first critical  
20  
21 steps towards developing an IQ framework (16). Thus, this systematic review aims to  
22  
23 identify, define and harmonise dimensions within existing IQ frameworks in eHealth. In  
24  
25 addition, the review will develop a new IQ framework for eHealth using the harmonised  
26  
27 dimensions.  
28  
29  
30  
31  
32

### 33 **METHODS AND ANALYSIS**

34  
35 The protocol is based on the Preferred Reporting Items for Systematic Reviews and Meta-  
36  
37 Analysis Protocols (PRISMA-P) checklist (17) presented as supplementary file 1. The team  
38  
39 of reviewers are healthcare and ICT professionals with research, teaching, and field  
40  
41 experience in eHealth.  
42  
43

#### 44 **Review Questions**

- 45 1. What IQ frameworks currently exist for evaluating eHealth?
- 46  
47 2. How are dimensions within these existing IQ frameworks defined by the  
48  
49 authors?
- 50  
51 3. How are IQ dimensions in eHealth related to each other?  
52  
53  
54

#### 55 **Eligibility Criteria**

The traditional systematic review approach based on **Population Intervention Comparator and Outcome (PICO)** is not fully applicable to this study as we aim to synthesise frameworks rather than interventions. The eligibility criteria are therefore based on the **BeHeMoTh** procedure (**B**ehaviour/phenomenon of interest, **H**ealth context and **M**odel/**T**heory), which is an approach recommended specifically for systematic review of theories and models (18-19). We will only include IQ frameworks for assessing eHealth technologies used for clinical purposes. In this review, we consider all technologies used for diagnostic, therapeutic or prognostic purposes as being used for clinical purposes, irrespective of whether they are used by healthcare professionals or patients. We will exclude IQ framework of eHealth technologies that manage only non-clinical or administrative data, which are less likely to directly affect patient safety. We will also exclude IQ frameworks that assess online health-related information and e-learning because they are not directly used in clinical management of the patient at the point of care. In addition, we will include multi-dimensional frameworks, but not individual dimension assessment. IQ is a multi-dimensional concept and individual dimension assessment cannot provide information about relationship existing between IQ dimensions. The inclusion and exclusion criteria are summarised in Table 1.

**Table 1: Inclusion and Exclusion Criteria**

| <b>Concept</b>         | <b>Inclusion</b>                                                                 | <b>Exclusion</b>                                                    |
|------------------------|----------------------------------------------------------------------------------|---------------------------------------------------------------------|
| Phenomenon of interest | Information or data quality of clinical data                                     | Information or data quality of administrative and non-clinical data |
| Health context         | eHealth use for clinical purposes (i.e. diagnostic, therapeutic and prognostic). | Online search for health-related information, e-learning            |
| Model/Theory           | Multi-dimensional framework                                                      | Individual dimension assessment                                     |
| Language               | English                                                                          | Non-English                                                         |
| Publication Status     | Published and grey literature                                                    | None                                                                |
| Time Frame             | All                                                                              | None                                                                |
| Type of study          | All                                                                              | None                                                                |



### **Information Sources**

We will search EMBASE, Medline, PubMed, Cumulative Index to Nursing and Allied Health Literature (CINAHL), Maternity and Infant Care, PsychINFO and Global Health which are bibliographic databases for healthcare. We will also search Scopus to identify eHealth publications in non-healthcare disciplines such as Engineering and Computer Science. In addition, we will search Health Management Information Consortium and ProQuest Dissertations and Theses Global that are considered as good sources of grey literature (20-21). Finally, we will manually search the references of included studies and track their citations using Scopus and Google Scholar for other eligible studies.

### **Search Strategy**

The search terms will be based on the key concepts already identified, i.e. information quality, eHealth and framework. Search terms relating to each of these concepts will be developed based on the literature and thesauruses. A librarian will be consulted for inputs in the search strategy. Both Medical Subject Headings (MeSH) and free-text terms will be searched. Truncation and adjacency searching will be used to increase the sensitivity of the search as appropriate. The search strategy is available through the link provided below ([https://www.crd.york.ac.uk/PROSPEROFILES/97142\\_STRATEGY\\_20180521.pdf](https://www.crd.york.ac.uk/PROSPEROFILES/97142_STRATEGY_20180521.pdf)).

### **Data Management**

The search results will be imported into the Endnote reference management software (<https://endnote.com>) which will be used to delete duplicates. Duplicates not identified by the

1  
2  
3 Endnotes will be manually removed. The results will then be uploaded to Covidence  
4 (<https://www.covidence.org>), a review management software programme, for study selection.  
5  
6

### 7 **Study Selection**

8  
9  
10 Titles and abstracts of the studies will be screened for eligibility by two independent  
11 reviewers (KPF and JA). Conflicts will be resolved by discussion between the two reviewers,  
12 and, if needed, by adjudication of a third independent reviewer (JOD, SOC or PAW). The  
13 full-text of all studies selected during screening will be reviewed independently by two  
14 reviewers (KPF and JA) with disagreement resolved as earlier described. A PRISMA flow  
15 chart will be used to show the details of the selection process (22).  
16  
17  
18  
19  
20  
21  
22

### 23 **Data Extraction**

24  
25 Two reviewers (KPF and SOC) will independently extract data in each eligible study using a  
26 pre-piloted Microsoft Excel data extraction form. Other reviewers (JOD, CC, PAW, JG and  
27 AM) will review the extracted data to ensure accuracy and completeness of the data. Study  
28 details that will be extracted will include: author(s), year of publication, country, affiliation,  
29 study aim, study design, publication status. We will also extract data on the IQ framework  
30 and these will include: method of development; method of validation (if any); type of eHealth  
31 technology (e.g. telemedicine, CDSS, WHS, EHR and EPS); IQ dimensions and their  
32 definition; categories of IQ dimensions (if any) and metrics of IQ dimension measurement (if  
33 any).  
34  
35  
36  
37  
38  
39  
40  
41  
42  
43  
44

### 45 **Study Outcomes**

#### 46 ***Primary outcomes***

- 47  
48  
49  
50 1. IQ frameworks of eHealth for clinical purposes: a systematic integration of IQ  
51 dimensions (criteria) with the purpose of evaluating health information technologies  
52 used in the diagnosis, treatment and prognosis of patient.  
53  
54  
55  
56  
57

2. IQ dimensions within the frameworks in eHealth: these are the evaluation criteria within the IQ frameworks that specify the extent to which health information technologies are fit for clinical use.
3. Definition of IQ dimensions in eHealth: a clear description of what aspect of information each of the dimensions assesses.

### ***Secondary outcomes***

1. Categories of dimensions within IQ frameworks in eHealth: IQ dimensions are often categorised in IQ frameworks to depict relationship existing among them.
2. Metrics of measurement of IQ dimensions in eHealth: How each IQ dimension is measured e.g. questionnaire, mathematical formulae etc.

### **Quality Assessment**

We will assess the quality of the included studies using the appropriate Critical Appraisal Skills Programme (CASP) checklist based on study design (23). However, studies will not be excluded based on quality assessment outcome.

### **Data Synthesis**

Thematic synthesis (24) will be employed to harmonize IQ dimensions within existing IQ frameworks. Codes will be generated from the definition of IQ dimensions within existing IQ frameworks and grouped into categories based on observed similarities and differences. Descriptive themes will be created to capture the meaning of the categories of the initial codes. We will infer the analytical themes from the descriptive themes. Generation of analytical themes from descriptive themes has been described as controversial because it is influenced by the insight and judgement of the reviewers (24). In order to mitigate this influence, all the reviewers will initially generate the analytical themes independently and then collectively as a group (24). The new IQ framework from eHealth will be derived from

1  
2  
3 the descriptive and analytical themes which will be the IQ dimensions and categories  
4  
5 respectively.  
6  
7

## 8 9 **ETHICS AND DISSEMINATION**

10  
11 Ethical approval is not required for this systematic review because primary data will not be  
12  
13 collected. This systematic review protocol is registered in the International Prospective  
14  
15 Register of Systematic Reviews (<http://www.crd.york.ac.uk/PROSPERO>), registration  
16  
17 number CRD42018097142 (25). The result of the review will be disseminated through  
18  
19 publication in an academic journal and scientific conferences.  
20  
21  
22  
23

## 24 25 **DISCUSSION**

26  
27 This systematic review aims to identify and define IQ dimensions for eHealth as well as  
28  
29 construct a new IQ framework for eHealth. The review is the first attempt to develop an IQ  
30  
31 framework using a systematic review approach, to the best of our knowledge. It is expected  
32  
33 that the adoption of a transparent and rigorous systematic review approach methodology will  
34  
35 result in an evidence-based IQ framework for eHealth. This newly developed framework will  
36  
37 specify aspects of eHealth information that should be assessed to determine if such  
38  
39 information is fit for diagnostic, therapeutic or prognostic purposes. Assessment of eHealth  
40  
41 using the evidence-based IQ framework could identify poor IQ issues and potentially forestall  
42  
43 associated patient safety problems (7-8).  
44  
45  
46  
47  
48  
49  
50  
51  
52  
53  
54  
55  
56  
57  
58  
59  
60

## REFERENCES

1. World Health Organization. Global diffusion of eHealth : making universal health coverage achievable. Report of the third global survey on eHealth. [Internet]. 2016. 156 p. Available from: [http://www.wipo.int/amc/en/mediation/rules%0AReport of the third global survey on eHealth Global Observatory for eHealth](http://www.wipo.int/amc/en/mediation/rules%0AReport%20of%20the%20third%20global%20survey%20on%20eHealth%20Global%20Observatory%20for%20eHealth)
2. Black AD, Car J, Pagliari C, et al. The Impact of eHealth on the Quality and Safety of Health Care: A Systematic Overview. *PLoS Med* 2011 [accessed 18 May 2018];8(1). Available from: <http://www.haps.bham.ac.uk/publichealth/cfhep/>.
3. Alotaibi YK, Federico F. The impact of health information technology on patient safety. *Saudi Med J* 2017;38(12):1173–80.
4. US Department of Health and Human Services. Expanding the Reach and Impact of Consumer e-Health Tools. Washington, DC: US Department of Health and Human Services, 2006. <http://www.health.gov/communication/ehealth/ehealthtools/default.htm>
5. Catwell L, Sheikh A. Evaluating eHealth Interventions: The Need for Continuous Systemic Evaluation. *PLoS Med* 2009;6(8). <http://journals.plos.org/plosmedicine/article/file?id=10.1371/journal.pmed.1000126&type=printable> [accessed 19 May 2018]
6. Clarke A, Adamson J, Watt I, et al. The impact of electronic records on patient safety: a qualitative study. *BMC Med Inform Decis Mak* 2016;16(62). <https://bmcmmedinformdecismak.biomedcentral.com/track/pdf/10.1186/s12911-016-0299-y> [accessed 19 May 2018]
7. Magrabi F, Ong M, Runciman W, et al. Patient safety problems associated with healthcare information technology: an analysis of adverse events reported to the US Food and Drug Administration. *AMIA Annu Symp Proc*. 2011;2011(1):853–7. <http://www.pubmedcentral.nih.gov/articlerender.fcgi?artid=3243129&tool=pmcentrez&rendertype=abstract>
8. Magrabi F, Baker M, Sinha I, et al. Clinical safety of England's national programme for IT: A retrospective analysis of all reported safety events 2005 to 2011. *Int J Med Inform* 2015;84(3):198–206. <http://dx.doi.org/10.1016/j.ijmedinf.2014.12.003>
9. Lee YW, Strong DM, Kahn BK, Wang RY. AIMQ: a methodology for information quality assessment. *Inf Manag* 2002;40:133–146. <http://mitiq.mit.edu/Documents/Publications/TDQMpub/2002/AIMQ.pdf>
10. Alkhattabi M, Neagu D, Cullen A. Information quality framework for e-learning systems. *Knowl Manag E-Learning An Int J*. 2010;2(4):162–70.
11. Eppler MJ, Wittig D. Conceptualizing Information Quality: A Review of Information Quality Frameworks from the Last Ten Years. In: Conference on Information Quality. 2000. [https://www.researchgate.net/publication/220918665\\_Conceptualizing\\_Information\\_Quality\\_A\\_Review\\_of\\_Information\\_Quality\\_Frameworks\\_from\\_the\\_Last\\_Ten\\_Years](https://www.researchgate.net/publication/220918665_Conceptualizing_Information_Quality_A_Review_of_Information_Quality_Frameworks_from_the_Last_Ten_Years)
12. Almutiry O, Wills G, Alwabel A. Toward a framework for data quality in cloud-based health information system. *Int Conf Inf Soc (i-Society)* 2013. 2013;153–7.
13. Chen H, Hailey D, Wang N, et al. A Review of Data Quality Assessment Methods for Public Health Information Systems. *Int J Environ Res Public Health* 2014;11(5):5170.
14. Boudreaux ED, Waring ME, Hayes RB, et al. Evaluating and selecting mobile health apps: strategies for healthcare providers and healthcare organizations. *Transl Behav Med* 2014 Dec;4(4):363–71. <http://www.ncbi.nlm.nih.gov/pubmed/25584085>
15. Stoyanov SR, Hides L, Kavanagh DJ, et al. Mobile app rating scale: a new tool for assessing the quality of health mobile apps. *JMIR mHealth uHealth*. 2015

- 1  
2  
3 Mar;3(1):e27–e27. <http://mhealth.jmir.org/2015/1/e27/>
- 4 16. Kerr K. The Institutionalisation of Data Quality in the New Zealand Health Sector.  
5 The University of Auckland; 2006.
- 6 17. Shamseer L, Moher D, Clarke M, et al. Preferred reporting items for systematic review  
7 and meta-analysis protocols (prisma-p) 2015: Elaboration and explanation. *BMJ*  
8 2015;350(January):1–25.
- 9 18. Carroll C, Booth A, Leaviss J, et al. “Best fit” framework synthesis: refining the  
10 method. *BMC Med Res Methodol* 2013; 13:37  
11 [https://bmcmmedresmethodol.biomedcentral.com/track/pdf/10.1186/1471-2288-13-](https://bmcmmedresmethodol.biomedcentral.com/track/pdf/10.1186/1471-2288-13-37?site=bmcmmedresmethodol.biomedcentral.com)  
12 [37?site=bmcmmedresmethodol.biomedcentral.com](https://bmcmmedresmethodol.biomedcentral.com/track/pdf/10.1186/1471-2288-13-37?site=bmcmmedresmethodol.biomedcentral.com)
- 13 19. Booth A, Carroll C. Systematic searching for theory to inform systematic reviews: Is it  
14 feasible? Is it desirable? *Health Info Libr J* 2015;32(3):220–35.
- 15 20. Haig A, Dozier M. BEME Guide No 3: Systematic searching for evidence in medical  
16 education—Part 1: Sources of information. *Med Teach* 2003;25(4):352–63.
- 17 21. Boukacem-Zeghmouri C, Schöpfel J. Document supply and open access: an  
18 international survey on grey literature. *Interlend Doc Supply* 2006;34(3):96–104.  
19 Available from: <http://www.emeraldinsight.com/doi/10.1108/02641610610686012>
- 20 22. Moher D, Liberati A, Tetzlaff J, Altman DG. Preferred reporting items for systematic  
21 reviews and meta-analyses: the PRISMA statement. *BMJ* 2009;339(jul21 1):b2535–  
22 b2535. <http://www.bmj.com/cgi/doi/10.1136/bmj.b2535>
- 23 23. Critical Appraisal Skills Programme. CASP Checklists. 2018 [https://casp-uk.net/casp-](https://casp-uk.net/casp-tools-checklists/)  
24 [tools-checklists/](https://casp-uk.net/casp-tools-checklists/) [accessed 19 May 2018]
- 25 24. Thomas J, Harden A. Methods for the thematic synthesis of qualitative research in  
26 systematic reviews. *BMC Med Res Methodol* 2008 Dec 10;8(1):45.  
27 <http://bmcmmedresmethodol.biomedcentral.com/articles/10.1186/1471-2288-8-45>  
28 [accessed 19 May 2018]
- 29 25. Fadahunsi K, Akinlua J, O’Connor S, et al. Information quality frameworks in  
30 eHealth: a systematic review. PROSPERO 2018 CRD42018097142  
31 [https://www.crd.york.ac.uk/prospero/export\\_record\\_pdf.php](https://www.crd.york.ac.uk/prospero/export_record_pdf.php) [accessed 6 Jun 2018]  
32  
33  
34  
35  
36  
37  
38  
39  
40  
41  
42  
43  
44  
45  
46  
47  
48  
49  
50  
51  
52  
53  
54  
55  
56  
57  
58  
59  
60

1  
2  
3 **Acknowledgements:** Many thanks to Rebecca Jones, library manager and liaison librarian at  
4 the Charring Cross Library, Imperial College London, for useful advice on strategies for our  
5 literature search.  
6  
7

8  
9  
10 **Author Contributions:** KPF and JOD conceived the study. KPF drafted the protocol  
11 manuscript. JTA, SOC, PAW, CC, AM, JG, JOD revised the manuscript for important  
12 intellectual content; and contributed to the methodology including search strategy, study  
13 selection, data extraction and data analysis. AM is the Clinical Lead and JOD is the  
14 Guarantor of the review.  
15  
16  
17  
18  
19

20  
21  
22 **Funding:** The first and second authors (KPF and JTA) are funded by the Federal  
23 Government of Nigeria. The funder has no role in the development of the protocol or in the  
24 actual systematic review.  
25  
26  
27

28  
29  
30 **Competing Interests:** None  
31  
32  
33  
34  
35  
36  
37  
38  
39  
40  
41  
42  
43  
44  
45  
46  
47  
48  
49  
50  
51  
52  
53  
54  
55  
56  
57  
58  
59  
60

## PRISMA-P Checklist of the Protocol for a Systematic Review and Qualitative Synthesis of Information Quality Frameworks in eHealth

| Section and topic                 | Item No | Checklist item                                                                                                                                                                                                  | Reporting Page No |
|-----------------------------------|---------|-----------------------------------------------------------------------------------------------------------------------------------------------------------------------------------------------------------------|-------------------|
| <b>ADMINISTRATIVE INFORMATION</b> |         |                                                                                                                                                                                                                 |                   |
| Title:                            |         |                                                                                                                                                                                                                 |                   |
| Identification                    | 1a      | Identify the report as a protocol of a systematic review                                                                                                                                                        | 1                 |
| Update                            | 1b      | If the protocol is for an update of a previous systematic review, identify as such                                                                                                                              | NA                |
| Registration                      | 2       | If registered, provide the name of the registry (such as PROSPERO) and registration number                                                                                                                      | 2                 |
| Authors:                          |         |                                                                                                                                                                                                                 |                   |
| Contact                           | 3a      | Provide name, institutional affiliation, e-mail address of all protocol authors; provide physical mailing address of corresponding author                                                                       | 1                 |
| Contributions                     | 3b      | Describe contributions of protocol authors and identify the guarantor of the review                                                                                                                             | 13                |
| Amendments                        | 4       | If the protocol represents an amendment of a previously completed or published protocol, identify as such and list changes; otherwise, state plan for documenting important protocol amendments                 | NA                |
| Support:                          |         |                                                                                                                                                                                                                 |                   |
| Sources                           | 5a      | Indicate sources of financial or other support for the review                                                                                                                                                   | 13                |
| Sponsor                           | 5b      | Provide name for the review funder and/or sponsor                                                                                                                                                               | 13                |
| Role of sponsor or funder         | 5c      | Describe roles of funder(s), sponsor(s), and/or institution(s), if any, in developing the protocol                                                                                                              | 13                |
| <b>INTRODUCTION</b>               |         |                                                                                                                                                                                                                 |                   |
| Rationale                         | 6       | Describe the rationale for the review in the context of what is already known                                                                                                                                   | 4-5               |
| Objectives                        | 7       | Provide an explicit statement of the question(s) the review will address with reference to participants, interventions, comparators, and outcomes (PICO)                                                        | 5-6               |
| <b>METHODS</b>                    |         |                                                                                                                                                                                                                 |                   |
| Eligibility criteria              | 8       | Specify the study characteristics (such as PICO, study design, setting, time frame) and report characteristics (considered, language, publication status) to be used as criteria for eligibility for the review | 5-6               |
| Information sources               | 9       | Describe all intended information sources (such as electronic databases, contact with study authors, trial registers or other grey literature sources) with planned dates of coverage                           | 7                 |
| Search strategy                   | 10      | Present draft of search strategy to be used for at least one electronic database, including planned limits, such that it could be repeated                                                                      | 7                 |



| Section and topic                  | Item No | Checklist item                                                                                                                                                                                                                                   | Reporting Page No |
|------------------------------------|---------|--------------------------------------------------------------------------------------------------------------------------------------------------------------------------------------------------------------------------------------------------|-------------------|
| Study records:                     |         |                                                                                                                                                                                                                                                  |                   |
| Data management                    | 11a     | Describe the mechanism(s) that will be used to manage records and data throughout the review                                                                                                                                                     | 7                 |
| Selection process                  | 11b     | State the process that will be used for selecting studies (such as two independent reviewers) through each phase of the review (that is, screening, eligibility and inclusion in meta-analysis)                                                  | 7-8               |
| Data collection process            | 11c     | Describe planned method of extracting data from reports (such as piloting forms, done independently, in duplicate), any processes for obtaining and confirming data from investigators                                                           | 8                 |
| Data items                         | 12      | List and define all variables for which data will be sought (such as PICO items, funding sources), any pre-planned data assumptions and simplifications                                                                                          | 8-9               |
| Outcomes and prioritization        | 13      | List and define all outcomes for which data will be sought, including prioritization of main and additional outcomes, with rationale                                                                                                             | 8-9               |
| Risk of bias in individual studies | 14      | Describe anticipated methods for assessing risk of bias of individual studies, including whether this will be done at the outcome or study level, or both; state how this information will be used in data synthesis                             | 9                 |
| Data synthesis                     | 15a     | Describe criteria under which study data will be quantitatively synthesised                                                                                                                                                                      | NA                |
|                                    | 15b     | If data are appropriate for quantitative synthesis, describe planned summary measures, methods of handling data and methods of combining data from studies, including any planned exploration of consistency (such as $I^2$ , Kendall's $\tau$ ) | NA                |
|                                    | 15c     | Describe any proposed additional analyses (such as sensitivity or subgroup analyses, meta-regression)                                                                                                                                            | NA                |
|                                    | 15d     | If quantitative synthesis is not appropriate, describe the type of summary planned                                                                                                                                                               | 9                 |
| Meta-bias(es)                      | 16      | Specify any planned assessment of meta-bias(es) (such as publication bias across studies, selective reporting within studies)                                                                                                                    | NA                |
| Confidence in cumulative evidence  | 17      | Describe how the strength of the body of evidence will be assessed (such as GRADE)                                                                                                                                                               | NA                |

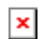

## Protocol for a Systematic Review and Qualitative Synthesis of Information Quality Frameworks in eHealth

|                                 |                                                                                                                                                                                                                                                                                                                                                                                                                                                                                                                                                                                                                                                                                                                                                                                                                                                                                                                                                            |
|---------------------------------|------------------------------------------------------------------------------------------------------------------------------------------------------------------------------------------------------------------------------------------------------------------------------------------------------------------------------------------------------------------------------------------------------------------------------------------------------------------------------------------------------------------------------------------------------------------------------------------------------------------------------------------------------------------------------------------------------------------------------------------------------------------------------------------------------------------------------------------------------------------------------------------------------------------------------------------------------------|
| Journal:                        | <i>BMJ Open</i>                                                                                                                                                                                                                                                                                                                                                                                                                                                                                                                                                                                                                                                                                                                                                                                                                                                                                                                                            |
| Manuscript ID                   | bmjopen-2018-024722.R1                                                                                                                                                                                                                                                                                                                                                                                                                                                                                                                                                                                                                                                                                                                                                                                                                                                                                                                                     |
| Article Type:                   | Protocol                                                                                                                                                                                                                                                                                                                                                                                                                                                                                                                                                                                                                                                                                                                                                                                                                                                                                                                                                   |
| Date Submitted by the Author:   | 05-Nov-2018                                                                                                                                                                                                                                                                                                                                                                                                                                                                                                                                                                                                                                                                                                                                                                                                                                                                                                                                                |
| Complete List of Authors:       | Fadahunsi, Kayode; Imperial College London, Department of Primary Care and Public Health; Federal Ministry of Health, Hospital Services Akinlua, James; University College London, Department of Primary Care and Population Health<br>O'Connor, Siobhan; Edinburgh Napier University, School of Health and Social Care<br>Wark, Petra; Imperial College London, Department of Primary Care and Public Health; Coventry University, Centre for Innovative Research Across the Life Course, Faculty of Health and Life Sciences,<br>Gallagher, Joseph; University College Dublin, gHealth Research Group<br>Carroll, Christopher; University of Sheffield, School of Health and Related Research (SchARR)<br>Majeed, Azeem; Imperial College, Department of Primary Care and Public Health<br>O'Donoghue, John; Imperial College London, Department of Primary Care and Public Health; University College Cork, Department of Business Information Systems, |
| <b>Primary Subject Heading</b>: | Public health                                                                                                                                                                                                                                                                                                                                                                                                                                                                                                                                                                                                                                                                                                                                                                                                                                                                                                                                              |
| Secondary Subject Heading:      | Health informatics                                                                                                                                                                                                                                                                                                                                                                                                                                                                                                                                                                                                                                                                                                                                                                                                                                                                                                                                         |
| Keywords:                       | Health informatics < BIOTECHNOLOGY & BIOINFORMATICS, Telemedicine < BIOTECHNOLOGY & BIOINFORMATICS, Quality in health care < HEALTH SERVICES ADMINISTRATION & MANAGEMENT, Systematic Review, Information Quality                                                                                                                                                                                                                                                                                                                                                                                                                                                                                                                                                                                                                                                                                                                                           |
|                                 |                                                                                                                                                                                                                                                                                                                                                                                                                                                                                                                                                                                                                                                                                                                                                                                                                                                                                                                                                            |

SCHOLARONE™  
Manuscripts

# Protocol for a Systematic Review and Qualitative Synthesis of Information Quality Frameworks in eHealth

Kayode Philip Fadahunsi,<sup>1,2</sup> James Tosin Akinlua,<sup>3</sup> Siobhan O'Connor,<sup>4</sup> Petra A Wark,<sup>1,5</sup>  
Joseph Gallagher,<sup>6</sup> Christopher Carroll,<sup>7</sup> Azeem Majeed,<sup>1</sup> John O'Donoghue<sup>1,8\*</sup>

1. Department of Primary Care and Public Health, Imperial College London, United Kingdom.
2. Department of Hospital Services, Federal Ministry of Health, Abuja, Nigeria.
3. Department of Primary Care and Population Health, University College London, United Kingdom.
4. School of Health and Social Care, Edinburgh Napier University, Edinburgh, Scotland, United Kingdom.
5. Centre for Innovative Research Across the Life Course, Faculty of Health and Life Sciences, Coventry University, Coventry, United Kingdom.
6. gHealth Research Group, School of Medicine, University College Dublin, Ireland.
7. Health Economics and Decision Science, School of Health and Related Research, The University of Sheffield, United Kingdom.
8. Department of Business Information Systems, University College Cork, Ireland.

## \*Corresponding Author

John O'Donoghue

[j.odonoghue@imperial.ac.uk](mailto:j.odonoghue@imperial.ac.uk)

**Word Count:** 2640

## ABSTRACT

**Introduction:** Electronic health (eHealth) applications have become a very large repository of health information which informs critical decisions relating to the diagnosis, treatment and prognosis of patients. Poor information quality (IQ) within eHealth may compromise patient safety. Evaluation of IQ in eHealth is therefore necessary to promote patient safety. An IQ framework specifies what aspects of information to assess and how to conduct the assessment. This systematic review aims to identify dimensions within existing IQ frameworks in eHealth and develop a new IQ framework for assessment of eHealth.

**Method and Analysis:** We will search EMBASE, Medline, PubMed, Cumulative Index to Nursing and Allied Health Literature (CINAHL), Maternity and Infant Care, PsycINFO, Global Health, Scopus, ProQuest Dissertations and Theses Global, Health Management Information Consortium and reference lists of relevant publications for articles published in English until November 2018. Studies will be selected by two independent reviewers based on pre-specified eligibility criteria. Two reviewers will independently extract data in each eligible study using a pre-piloted Microsoft Excel data extraction form. Thematic synthesis will be employed to define IQ dimensions and develop a new IQ framework for eHealth.

**Ethics and Dissemination:** Ethical approval is not required for this systematic review as primary data will not be collected. The result of the review will be disseminated through publication in an academic journal and scientific conferences.

**Keywords:** Quality in healthcare, health informatics, telemedicine, systematic review, information quality

**Review Registration:** PROSPERO CRD42018097142

### Strengths and limitations of this study

- This study will contribute an evidence-based framework for assessing IQ in eHealth.
- The protocol is based on PRISMA-P guidelines.
- We used a theoretical framework to develop the search strategy.
- The review will not provide specific information on the level of relevance of each IQ dimension included in the new IQ framework.

For peer review only

## INTRODUCTION

Electronic health (eHealth), defined as the use of information and communication technology (ICT) in healthcare, is regarded as a modern driver of universal health coverage and quality healthcare delivery (1). A range of eHealth applications including Telemedicine, Electronic Health Records (EHRs), Clinical Decision Support Systems (CDSS), Mobile Health (mHealth) applications, Computerised Physician Order Entry (CPOE), Electronic Prescribing Systems (EPS) and Web-based Health Services (WHS), have all recorded varying levels of success in promoting access to quality health services (2-3). Over time, eHealth applications have become a very large repository of health information which informs critical decisions relating to the diagnosis, treatment and prognosis of patients (1,4). Against the backdrop of its increasing adoption, there are concerns that poor information quality (IQ) in eHealth may compromise patient safety (5-6). A number of patient safety problems associated with eHealth have been reported in the United Kingdom and the United States of America (7-8). These problems are classified as human factors, which are predominantly data entry errors; and technical factors, which are majorly IQ issues such as incorrect, partial and/or delayed information output (7-8). For example, incomplete information by CPOE led to medication overdose and subsequent acute renal failure in a patient (7). Evaluation of IQ in eHealth is therefore necessary to promote patient safety. Although human errors contribute to patient safety problems associated with eHealth, these factors could be addressed through clinical governance and other interventions which are beyond the scope of this review.

IQ describes the extent to which information is fit for purpose (9). Each dimension of IQ describes an aspect of information (10-11). For example, completeness is the extent to which data is sufficient for the task at hand; and timeliness is the extent to which up-to-date data is available when needed (12). An IQ framework is a systematic integration of IQ dimensions for the purpose of evaluating a specific information system (9,11). An IQ framework

traditionally specifies what aspects of information to assess and how to conduct the assessment (10-11). An IQ framework also depicts the relationship existing among IQ dimensions by categorising them (12). However, some frameworks only conceptualise IQ without providing guidance on its assessment (9,11). For example, one IQ framework for EHR conceptualises IQ using eleven dimensions (12). The IQ framework depicts the relationship among 'privacy', 'confidentiality' and 'secure access' dimensions by grouping them in 'security' category (12). The dimensions and categories in the IQ Framework are presented on Table 1.

Table 1: Dimensions and Categories of an Existing IQ Framework for EHR

| IQ Category   | IQ Dimensions    |
|---------------|------------------|
| Information   | Accuracy         |
|               | Completeness     |
|               | Consistency      |
|               | Relevance        |
|               | Timeliness       |
|               | Usability        |
| Communication | Provenance       |
|               | Interpretability |
| Security      | Privacy          |
|               | Confidentiality  |
|               | Secure Access    |

A number of IQ frameworks have been developed to evaluate different types of health information systems (13). However, IQ frameworks for newer types of eHealth, such as the mHealth apps, are virtually non-existent (14-15) and there is no generic IQ framework for eHealth which is applicable across different eHealth applications. Also, there is no consensus on IQ dimensions that are relevant to eHealth and their definition. It is therefore necessary to synthesise the definition of the IQ dimensions within existing frameworks. Identification and definition of IQ dimensions are the first critical steps towards developing an IQ framework (16). Thus, this systematic review aims to identify and define dimensions within existing IQ

1  
2  
3 frameworks in eHealth. In addition, the review will develop a new IQ framework for eHealth  
4  
5 using the dimensions synthesized from the existing IQ frameworks for eHealth applications.  
6  
7  
8  
9

## 10 11 **METHODS AND ANALYSIS**

12  
13 The protocol is based on the Preferred Reporting Items for Systematic Reviews and Meta-  
14  
15 Analysis Protocols (PRISMA-P) checklist (17) presented as supplementary file 1. The review  
16  
17 team are healthcare and ICT professionals with research, teaching, and clinical experience in  
18  
19 eHealth. AM, JTA, KPF and JG are medical practitioners with hands-on experience in the use  
20  
21 of eHealth applications in clinical practice. SOC has a multidisciplinary background in  
22  
23 Nursing and Information System. PAW is a nutritional and chronic disease epidemiologist  
24  
25 with expertise in digital health technologies. JOD has an expertise in ICT and IQ. CC is an  
26  
27 expert in health technology assessment, systematic review and evidence synthesis. AM, JG,  
28  
29 JOD, PAW and SOC also have a vast research and teaching experience in eHealth.  
30  
31  
32  
33  
34  
35  
36

### 37 **Review Questions**

- 38 1. What IQ frameworks currently exist for evaluating eHealth applications?
- 39 2. How are dimensions within these existing IQ frameworks defined by the authors?
- 40 3. Which IQ dimensions indicate how well information in eHealth is fit for diagnostic,  
41  
42 therapeutic or prognostic purposes?
- 43 4. How are these IQ dimensions in eHealth related to one another?  
44  
45  
46  
47  
48  
49  
50  
51  
52  
53  
54  
55  
56  
57  
58  
59  
60



## Eligibility Criteria

The traditional systematic review approach based on **Population Intervention Comparator** and **Outcome** (PICO) is not fully applicable to this study as we aim to synthesise frameworks rather than interventions. The eligibility criteria are therefore based on the BeHeMoTh procedure (**B**ehaviour/phenomenon of interest, **H**ealth context and **M**odel/**T**heory), which is an approach recommended specifically for identifying frameworks, theories and models in systematic review (18-19). The inclusion and exclusion criteria are presented in Table 2.

**Table 2: Inclusion and Exclusion Criteria**

| <b>Concept</b>         | <b>Inclusion</b>                                                                   | <b>Exclusion</b>                                                                                    |
|------------------------|------------------------------------------------------------------------------------|-----------------------------------------------------------------------------------------------------|
| Phenomenon of interest | Information or data quality                                                        | Information or data quality of administrative and non-clinical data                                 |
| Health context         | Use of eHealth for clinical purposes (i.e. diagnostic, therapeutic or prognostic). | Online search for health-related information, e-learning, eHealth applications for self-management. |
| Model/Theory           | Multi-dimensional framework                                                        | Individual dimension assessment                                                                     |
| Language               | English                                                                            | Non-English                                                                                         |
| Publication Status     | Published and grey literature                                                      | None                                                                                                |
| Date of Publication    | Any                                                                                | None                                                                                                |
| Type of Study          | Any                                                                                | None                                                                                                |

We will only include IQ frameworks for assessing eHealth applications used for clinical purposes. We will exclude IQ framework of eHealth applications that manage only non-clinical or administrative data, which are less likely to directly affect patient safety. We will also exclude IQ frameworks that assess online health-related information and e-learning because they are not directly used in clinical management of the patient at the point of care. We will exclude self-management applications, used by patients for health education and disease tracking purposes, as their IQ requirements are probably different compared to the applications used by healthcare professionals for clinical purposes. In addition, we will

1  
2  
3 include multi-dimensional frameworks, but not individual dimension assessment. IQ is a  
4 multi-dimensional concept and individual dimension assessment cannot provide information  
5 about existing relationship between IQ dimensions. Both published and grey literatures will  
6 be included. There will be no restriction based on date of publication. Thus, all relevant  
7 studies until November 2018 will be included. There will be no restriction based on study  
8 type as there is no evidence that one study type is superior to another when developing a  
9 framework. In addition, restriction based on study type may lead to exclusion of potentially  
10 relevant IQ frameworks.  
11  
12  
13  
14  
15  
16  
17  
18  
19  
20  
21  
22  
23  
24  
25

### 26 **Information Sources**

27  
28 We will search EMBASE, Medline, PubMed, Cumulative Index to Nursing and Allied Health  
29 Literature (CINAHL), Maternity and Infant Care, PsycINFO and Global Health which are  
30 bibliographic databases for healthcare. We will search Scopus to identify eHealth  
31 publications in non-healthcare disciplines such as Engineering and Computer Science. In  
32 addition, we will search Health Management Information Consortium and ProQuest  
33 Dissertations and Theses Global that are considered as good sources of grey literature (20-  
34 21). Finally, we will manually search the references of included studies and track their  
35 citations to identify other eligible studies using Scopus and Google Scholar.  
36  
37  
38  
39  
40  
41  
42  
43  
44  
45  
46  
47  
48

### 49 **Search Strategy**

50  
51 The search terms will be based on three key concepts, information quality (Behaviour or  
52 phenomenon of interest), eHealth (Health context) and framework (Models or Theories).  
53 Search terms relating to each of these concepts will be developed based on the literature and  
54 thesauruses. A librarian will be consulted for inputs in the search strategy. Both Medical  
55  
56  
57  
58  
59  
60

1  
2  
3 Subject Headings (MeSH) and free-text terms will be searched. Truncation and adjacency  
4  
5 searching will be used to increase the sensitivity of the search as appropriate. The initial  
6  
7 search strategy is available from:

8  
9  
10 [https://www.crd.york.ac.uk/PROSPEROFILES/97142\\_STRATEGY\\_20180521.pdf](https://www.crd.york.ac.uk/PROSPEROFILES/97142_STRATEGY_20180521.pdf)  
11  
12  
13  
14

### 15 **Data Management**

16  
17 The search results will be imported into the Endnote reference management software  
18  
19 (<https://endnote.com>) which will be used to delete duplicates. Duplicates not identified by the  
20  
21 Endnotes will be manually removed. The study selection will be done with Covidence  
22  
23 (<https://www.covidence.org>), a review-management software programme which is in  
24  
25 partnership with Cochrane Collaboration.  
26  
27  
28  
29  
30  
31  
32

### 33 **Study Selection**

34  
35 Titles and abstracts of the studies will be screened for eligibility by two independent  
36  
37 reviewers (KPF and JA) using the criteria outlined in Table 2. Conflicts will be resolved by  
38  
39 discussion between the two reviewers, and, if needed, by adjudication of a third independent  
40  
41 reviewer (JOD, SOC or PAW). The full-text of all studies selected during screening will be  
42  
43 reviewed independently by two reviewers (KPF and JA) with disagreement resolved as  
44  
45 earlier described. A PRISMA flow chart will be used to show the details of the selection  
46  
47 process (22).  
48  
49  
50  
51  
52  
53

### 54 **Data Extraction**

55  
56 Two reviewers (KPF and SOC) will independently extract data in each eligible study using a  
57  
58 pre-piloted Microsoft Excel data extraction form. Other reviewers (JOD, CC, PAW, JG and  
59  
60

1  
2  
3 AM) will review the extracted data to ensure accuracy and completeness of the data. Study  
4  
5 details that will be extracted will include: author(s), year of publication, country, affiliation,  
6  
7 study aim, study design, publication status. We will also extract data on the IQ framework  
8  
9 and these will include: method of development; method of validation (if any); type of eHealth  
10  
11 technology (e.g. telemedicine, CDSS, WHS, EHR and EPS); IQ dimensions and their  
12  
13 verbatim definition; categories of IQ dimensions (if any) and metrics of IQ dimension  
14  
15 measurement (if any). The main data elements are further defined below:  
16  
17  
18

- 19  
20 1. IQ frameworks for eHealth applications: a systematic integration of IQ dimensions  
21  
22 with the purpose of evaluating health information technologies used in the diagnosis,  
23  
24 treatment and prognosis of patient.  
25
- 26  
27 2. IQ dimensions within the frameworks in eHealth: these are the evaluation criteria  
28  
29 within the IQ frameworks that specify the extent to which health information  
30  
31 technologies are fit for clinical use.  
32
- 33  
34 3. Definition of IQ dimensions in eHealth: a clear description of what aspect of  
35  
36 information each dimension assesses.  
37
- 38  
39 4. Categories of dimensions within IQ frameworks in eHealth (if provided): IQ  
40  
41 dimensions are often categorised to depict relationship among IQ dimensions in an IQ  
42  
43 framework.  
44
- 45  
46 5. Metrics of measurement of IQ dimensions in eHealth (if provided): How each IQ  
47  
48 dimension is measured e.g. questionnaire, mathematical formulae etc.  
49  
50  
51

## 52 53 **Quality Assessment**

54  
55 We will assess the quality of the included studies using the appropriate Critical Appraisal  
56  
57 Skills Programme (CASP) checklist based on study design (23). Studies will not be excluded  
58  
59 based on quality assessment outcome as this is unlikely to have any major impact on the  
60

1  
2  
3 ultimate definition of the dimensions and the construction of the IQ framework. However, the  
4  
5 assessment is intended to provide a general idea about the quality of the existing IQ  
6  
7 frameworks and the strength of evidence (24).  
8  
9

### 10 11 12 13 **Data Synthesis**

14  
15 The IQ framework for eHealth will be developed using a thematic synthesis approach which  
16  
17 comprises 3 stages (25).  
18

19  
20 In the first stage, codes will be generated from the verbatim definition of IQ dimensions  
21  
22 extracted from the existing frameworks. This will involve identification of unique concepts  
23  
24 from each definition of IQ dimension.  
25  
26

27  
28 In the second stage, the codes will be grouped into categories based on observed similarities  
29  
30 and differences, and a descriptive theme will be created to capture the meaning of each  
31  
32 category. These descriptive themes will be the IQ dimensions for the proposed framework.  
33  
34 Each of the IQ dimension will be defined based on the meaning of the original codes from  
35  
36 which they were developed.  
37  
38

39  
40 In the final stage, we will generate the analytical themes from the descriptive themes.  
41  
42 Analytical themes are interpretation of the descriptive themes which usually go beyond the  
43  
44 findings of the original studies. The analytical themes will be inferred from the descriptive  
45  
46 themes (IQ dimensions) based on the interrelationship observed from the definition of the  
47  
48 dimensions. This stage will involve organisation of the IQ dimensions (descriptive themes)  
49  
50 into different categories conceptualised by the reviewers based on their understanding of the  
51  
52 definition of the dimensions. Thus, the analytical themes will be the IQ categories in the new  
53  
54 framework. All the reviewers will initially generate the analytical themes independently and  
55  
56 then collectively as a group so as to minimize bias (25).  
57  
58  
59  
60

1  
2  
3 Thus, the new IQ framework for eHealth will be derived from the thematic synthesis of the  
4  
5  
6  
7  
8  
9  
10  
11  
12  
13  
14  
15  
16  
17  
18  
19  
20  
21  
22  
23  
24  
25  
26  
27  
28  
29  
30  
31  
32  
33  
34  
35  
36  
37  
38  
39  
40  
41  
42  
43  
44  
45  
46  
47  
48  
49  
50  
51  
52  
53  
54  
55  
56  
57  
58  
59  
60  
Thus, the new IQ framework for eHealth will be derived from the thematic synthesis of the  
verbatim definition of IQ dimensions. The study details and other extracted framework-  
related information will provide an understanding of the context of the new IQ framework.

### **Patient and Public Involvement**

Patients and the public will not be involved directly in the design and conduct of the review.  
However, the development of the review questions was informed by patient safety concerns  
and the experience of health professionals using eHealth applications in clinical practice.

### **ETHICS AND DISSEMINATION**

Ethical approval is not required for this systematic review because primary data will not be  
collected. This systematic review protocol is registered in the International Prospective  
Register of Systematic Reviews (<http://www.crd.york.ac.uk/PROSPERO>), registration  
number CRD42018097142 (26). The result of the review will be disseminated through  
publication in an academic journal and scientific conferences.

### **DISCUSSION**

This systematic review aims to identify and define IQ dimensions as well as construct a new  
IQ framework for eHealth. This newly developed framework will specify aspects of eHealth  
information that should be assessed to determine if such information is fit for diagnostic,  
therapeutic or prognostic purposes.

This review is the first attempt to develop an evidence-based IQ framework using a  
systematic review approach, to the best of our knowledge. The use of a theoretical framework  
to develop the search strategy may also be considered as a strength of the review. However,  
generation of analytical themes from descriptive themes in thematic synthesis has been

1  
2  
3 described as controversial because it is influenced by the insight and judgment of the  
4 reviewers (25), but we believe that the multidisciplinary perspectives and vast experience of  
5 the reviewers will rather add values to data synthesis in this study. A limitation of this review  
6 is that the new IQ framework will be unable to provide specific information on the level of  
7 relevance of each IQ dimensions. We are planning a subsequent international online Delphi  
8 study to address this limitation.  
9

10  
11  
12 Finally, it is expected that the adoption of a transparent and rigorous systematic review  
13 approach methodology in this study will result in an evidence-based IQ framework for  
14 eHealth. Assessment of eHealth using the evidence-based IQ framework could identify poor  
15 IQ issues and potentially forestall associated patient safety problems (7-8).  
16  
17  
18  
19  
20  
21  
22  
23  
24  
25  
26  
27  
28  
29  
30  
31  
32  
33  
34  
35  
36  
37  
38  
39  
40  
41  
42  
43  
44  
45  
46  
47  
48  
49  
50  
51  
52  
53  
54  
55  
56  
57  
58  
59  
60

## REFERENCES

1. World Health Organization. Global diffusion of eHealth : making universal health coverage achievable. Report of the third global survey on eHealth. [Internet]. x. 156 p. Available from: <http://www.wipo.int/amc/en/mediation/rules%0AReport of the third global survey on eHealth Global Observatory for eHealth>
2. Black AD, Car J, Pagliari C, Anandan C, Cresswell K, Bokun T, et al. The Impact of eHealth on the Quality and Safety of Health Care: A Systematic Overview. PLoS Med [Internet]. 2011 [cited 2018 May 18];8(1). Available from: <http://www.haps.bham.ac.uk/publichealth/cfhep/>.
3. Alotaibi YK, Federico F. The impact of health information technology on patient safety. Saudi Med J. 2017;38(12):1173–80.
4. US Department of Health and human Services. Expanding the Reach and Impact of Consumer e-Health Tools [Internet]. Health Promotion. 2006. Available from: <http://www.health.gov/communication/ehealth/ehealthtools/default.htm>
5. Catwell L, Sheikh A. Evaluating eHealth Interventions: The Need for Continuous Systemic Evaluation. PLoS Med [Internet]. 2009 [cited 2018 May 19];6(8). Available from: <http://journals.plos.org/plosmedicine/article/file?id=10.1371/journal.pmed.1000126&type=printable>
6. Clarke A, Adamson J, Watt I, Sheard L, Cairns P, Wright J. The impact of electronic records on patient safety: a qualitative study. BMC Med Inform Decis Mak [Internet]. 2016 [cited 2018 May 19];16(62). Available from: <https://bmcmedinformdecismak.biomedcentral.com/track/pdf/10.1186/s12911-016-0299-y>
7. Magrabi F, Ong M, Runciman W, Coiera E. Patient safety problems associated with healthcare information technology: an analysis of adverse events reported to the US Food and Drug Administration. AMIA Annu Symp Proc [Internet]. 2011;2011(1):853–7. Available from: <http://www.pubmedcentral.nih.gov/articlerender.fcgi?artid=3243129&tool=pmcentrez&rendertype=abstract>
8. Magrabi F, Baker M, Sinha I, Ong MS, Harrison S, Kidd MR, et al. Clinical safety of england’s national programme for IT: A retrospective analysis of all reported safety events 2005 to 2011. Int J Med Inform [Internet]. 2015;84(3):198–206. Available from: <http://dx.doi.org/10.1016/j.ijmedinf.2014.12.003>
9. Lee YW, Strong DM, Kahn BK, Wang RY. AIMQ: a methodology for information quality assessment. Inf Manag [Internet]. 2002;40:133–146. Available from: <http://mitiq.mit.edu/Documents/Publications/TDQMpub/2002/AIMQ.pdf>
10. Alkhattabi M, Neagu D, Cullen A. Information quality framework for e-learning systems. Knowl Manag E-Learning An Int J. 2010;2(4):162–70.
11. Eppler MJ, Wittig D. Conceptualizing Information Quality: A Review of Information Quality Frameworks from the Last Ten Years. (PDF Download Available). In: Conference on Information Quality [Internet]. 2000. Available from: [https://www.researchgate.net/publication/220918665\\_Conceptualizing\\_Information\\_Quality\\_A\\_Review\\_of\\_Information\\_Quality\\_Frameworks\\_from\\_the\\_Last\\_Ten\\_Years](https://www.researchgate.net/publication/220918665_Conceptualizing_Information_Quality_A_Review_of_Information_Quality_Frameworks_from_the_Last_Ten_Years)
12. Almutiry O, Wills G, Alwabel A. Toward a framework for data quality in cloud-based health information system. Int Conf Inf Soc (i-Society 2013). 2013;153–7.
13. Chen H, Hailey D, Wang N, Yu P. A Review of Data Quality Assessment Methods for Public Health Information Systems. Int J Environ Res Public Health. 2014;11(5):5170.
14. Boudreaux ED, Waring ME, Hayes RB, Sadasivam RS, Mullen S, Pagoto S.



- 1  
2  
3  
4 Evaluating and selecting mobile health apps: strategies for healthcare providers and  
5 healthcare organizations. *Transl Behav Med* [Internet]. 2014 Dec;4(4):363–71.  
6 Available from: <http://www.ncbi.nlm.nih.gov/pubmed/25584085>
- 7 15. Stoyanov SR, Hides L, Kavanagh DJ, Zelenko O, Tjondronegoro D, Mani M. Mobile  
8 app rating scale: a new tool for assessing the quality of health mobile apps. *JMIR*  
9 *mHealth uHealth* [Internet]. 2015 Mar;3(1):e27–e27. Available from:  
10 <http://mhealth.jmir.org/2015/1/e27/>
- 11 16. Kerr K. *The Institutionalisation of Data Quality in the New Zealand Health Sector*.  
12 The University of Auckland; 2006.
- 13 17. Shamseer L, Moher D, Clarke M, Ghersi D, Liberati A, Petticrew M, et al. Preferred  
14 reporting items for systematic review and meta-analysis protocols (prisma-p) 2015:  
15 Elaboration and explanation. *BMJ*. 2015;349(January):1–25.
- 16 18. Carroll C, Booth A, Leaviss J, Rick J. “Best fit” framework synthesis: refining the  
17 method. *BMC Med Res Methodol* [Internet]. 2013; Available from:  
18 [https://bmcmedresmethodol.biomedcentral.com/track/pdf/10.1186/1471-2288-13-](https://bmcmedresmethodol.biomedcentral.com/track/pdf/10.1186/1471-2288-13-37?site=bmcmedresmethodol.biomedcentral.com)  
19 [37?site=bmcmedresmethodol.biomedcentral.com](https://bmcmedresmethodol.biomedcentral.com/track/pdf/10.1186/1471-2288-13-37?site=bmcmedresmethodol.biomedcentral.com)
- 20 19. Booth A, Carroll C. Systematic searching for theory to inform systematic reviews: Is it  
21 feasible? Is it desirable? *Health Info Libr J*. 2015;32(3):220–35.
- 22 20. Haig A, Dozier M. BEME Guide No 3: Systematic searching for evidence in medical  
23 education—Part 1: Sources of information. *Med Teach*. 2003;25(4):352–63.
- 24 21. Boukacem-Zeghmouri C, Schöpfel J. Document supply and open access: an  
25 international survey on grey literature. *Interlend Doc Supply* [Internet].  
26 2006;34(3):96–104. Available from:  
27 <http://www.emeraldinsight.com/doi/10.1108/02641610610686012>
- 28 22. Moher D, Liberati A, Tetzlaff J, Altman DG. Preferred reporting items for systematic  
29 reviews and meta-analyses: the PRISMA statement. *Bmj* [Internet]. 2009;339(jul21  
30 1):b2535–b2535. Available from: <http://www.bmj.com/cgi/doi/10.1136/bmj.b2535>
- 31 23. Critical Appraisal Skills Programme. CASP Checklists [Internet]. 2018 [cited 2018  
32 May 19]. Available from: <https://casp-uk.net/casp-tools-checklists/>
- 33 24. Popay J, Roberts H, Sowden A, Petticrew M, Arai L, Rodgers M, et al. *Guidance on*  
34 *the Conduct of Narrative Synthesis in Systematic Reviews*. 2006.
- 35 25. Thomas J, Harden A. Methods for the thematic synthesis of qualitative research in  
36 systematic reviews. *BMC Med Res Methodol* [Internet]. 2008 Dec 10 [cited 2018 May  
37 19];8(1):45. Available from:  
38 <http://bmcmedresmethodol.biomedcentral.com/articles/10.1186/1471-2288-8-45>
- 39 26. Fadahunsi K, Akinlua J, O’Connor S, Wark P, Gallagher J, Carroll C, et al.  
40 Information quality frameworks in eHealth: a systematic review. PROSPERO  
41 CRD42018097142 [Internet]. 2018 [cited 2018 Jun 6]; Available from:  
42 [https://www.crd.york.ac.uk/prospero/export\\_record\\_pdf.php](https://www.crd.york.ac.uk/prospero/export_record_pdf.php)
- 43  
44  
45  
46  
47  
48  
49  
50  
51  
52  
53  
54  
55  
56  
57  
58  
59  
60

1  
2  
3 **Acknowledgements:** Many thanks to Rebecca Jones, library manager and liaison librarian at  
4 the Charring Cross Library, Imperial College London, for useful advice on strategies for our  
5 literature search.  
6  
7  
8  
9

10  
11 **Author Contributions:** KPF and JOD conceived the study. KPF drafted the protocol  
12 manuscript. JTA, SOC, PAW, CC, AM, JG, JOD revised the manuscript for important  
13 intellectual content; and contributed to the methodology including search strategy, study  
14 selection, data extraction and data analysis. AM is the Clinical Lead and JOD is the  
15 Guarantor of the review.  
16  
17  
18  
19  
20  
21  
22

23  
24 **Funding:** There is no funding to report for this systematic review.  
25  
26

27 **Competing Interests:** No conflict of interest.  
28  
29  
30  
31  
32  
33  
34  
35  
36  
37  
38  
39  
40  
41  
42  
43  
44  
45  
46  
47  
48  
49  
50  
51  
52  
53  
54  
55  
56  
57  
58  
59  
60

**Protocol for a Systematic Review and Qualitative Synthesis of Information Quality Frameworks in eHealth; Supplementary File 1**  
**Preferred Reporting Items for Systematic Reviews and Meta-Analysis Protocols (PRISMA-P) Checklist**

| Section and topic                 | Item No | Checklist item                                                                                                                                                                                                                | Reporting Page No |
|-----------------------------------|---------|-------------------------------------------------------------------------------------------------------------------------------------------------------------------------------------------------------------------------------|-------------------|
| <b>ADMINISTRATIVE INFORMATION</b> |         |                                                                                                                                                                                                                               |                   |
| Title:                            |         |                                                                                                                                                                                                                               |                   |
| Identification                    | 1a      | Identify the report as a protocol of a systematic review                                                                                                                                                                      | 1                 |
| Update                            | 1b      | If the protocol is for an update of a previous systematic review, identify as such                                                                                                                                            | NA                |
| Registration                      | 2       | If registered, provide the name of the registry (such as PROSPERO) and registration number                                                                                                                                    | 2                 |
| Authors:                          |         |                                                                                                                                                                                                                               |                   |
| Contact                           | 3a      | Provide name, institutional affiliation, e-mail address of all protocol authors; provide physical mailing address of corresponding author                                                                                     | 1                 |
| Contributions                     | 3b      | Describe contributions of protocol authors and identify the guarantor of the review                                                                                                                                           | 16                |
| Amendments                        | 4       | If the protocol represents an amendment of a previously completed or published protocol, identify as such and list changes; otherwise, state plan for documenting important protocol amendments                               | NA                |
| Support:                          |         |                                                                                                                                                                                                                               |                   |
| Sources                           | 5a      | Indicate sources of financial or other support for the review                                                                                                                                                                 | 16                |
| Sponsor                           | 5b      | Provide name for the review funder and/or sponsor                                                                                                                                                                             | NA                |
| Role of sponsor or funder         | 5c      | Describe roles of funder(s), sponsor(s), and/or institution(s), if any, in developing the protocol                                                                                                                            | NA                |
| <b>INTRODUCTION</b>               |         |                                                                                                                                                                                                                               |                   |
| Rationale                         | 6       | Describe the rationale for the review in the context of what is already known                                                                                                                                                 | 4-5               |
| Objectives                        | 7       | Provide an explicit statement of the question(s) the review will address with reference to participants, interventions, comparators, and outcomes (PICO)                                                                      | 6                 |
| <b>METHODS</b>                    |         |                                                                                                                                                                                                                               |                   |
| Eligibility criteria              | 8       | Specify the study characteristics (such as PICO, study design, setting, time frame) and report characteristics (such as years considered, language, publication status) to be used as criteria for eligibility for the review | 7                 |
| Information sources               | 9       | Describe all intended information sources (such as electronic databases, contact with study authors,                                                                                                                          | 8                 |

|                                    |     |                                                                                                                                                                                                                                                  |       |
|------------------------------------|-----|--------------------------------------------------------------------------------------------------------------------------------------------------------------------------------------------------------------------------------------------------|-------|
|                                    |     | trial registers or other grey literature sources) with planned dates of coverage                                                                                                                                                                 |       |
| Search strategy                    | 10  | Present draft of search strategy to be used for at least one electronic database, including planned limits, such that it could be repeated                                                                                                       | 8-9   |
| Study records:                     |     |                                                                                                                                                                                                                                                  |       |
| Data management                    | 11a | Describe the mechanism(s) that will be used to manage records and data throughout the review                                                                                                                                                     | 9     |
| Selection process                  | 11b | State the process that will be used for selecting studies (such as two independent reviewers) through each phase of the review (that is, screening, eligibility and inclusion in meta-analysis)                                                  | 9     |
| Data collection process            | 11c | Describe planned method of extracting data from reports (such as piloting forms, done independently, in duplicate), any processes for obtaining and confirming data from investigators                                                           | 9-10  |
| Data items                         | 12  | List and define all variables for which data will be sought (such as PICO items, funding sources), any pre-planned data assumptions and simplifications                                                                                          | 10    |
| Outcomes and prioritization        | 13  | List and define all outcomes for which data will be sought, including prioritization of main and additional outcomes, with rationale                                                                                                             | NA    |
| Risk of bias in individual studies | 14  | Describe anticipated methods for assessing risk of bias of individual studies, including whether this will be done at the outcome or study level, or both; state how this information will be used in data synthesis                             | 10-11 |
| Data synthesis                     | 15a | Describe criteria under which study data will be quantitatively synthesised                                                                                                                                                                      | NA    |
|                                    | 15b | If data are appropriate for quantitative synthesis, describe planned summary measures, methods of handling data and methods of combining data from studies, including any planned exploration of consistency (such as $I^2$ , Kendall's $\tau$ ) | NA    |
|                                    | 15c | Describe any proposed additional analyses (such as sensitivity or subgroup analyses, meta-regression)                                                                                                                                            | NA    |
|                                    | 15d | If quantitative synthesis is not appropriate, describe the type of summary planned                                                                                                                                                               | 11    |
| Meta-bias(es)                      | 16  | Specify any planned assessment of meta-bias(es) (such as publication bias across studies, selective reporting within studies)                                                                                                                    | NA    |
| Confidence in cumulative evidence  | 17  | Describe how the strength of the body of evidence will be assessed (such as GRADE)                                                                                                                                                               | 10    |
