# Supplementary material for: Protocol for a systematic review and qualitative synthesis of information quality frameworks in eHealth
Source: PubMed Central journal article supplement — BMJ Open. 2019 Mar 5;9(3):e024722. doi: 10.1136/bmjopen-2018-024722 (PMC6429947; doi:10.1136/bmjopen-2018-024722), 2019-03-05
Supplement: bmjopen-2018-024722supp001.pdf [file bmjopen-2018-024722supp001.pdf]

## Protocol for a Systematic Review and Qualitative Synthesis of Information Quality Frameworks in eHealth; Supplementary File 1

### Preferred Reporting Items for Systematic Reviews and Meta-Analysis Protocols (PRISMA-P) Checklist

| Section and topic          | Item No | Checklist item                                                                                                                                                                                                       | Reporting Page No |
|----------------------------|---------|----------------------------------------------------------------------------------------------------------------------------------------------------------------------------------------------------------------------|-------------------|
| ADMINISTRATIVE INFORMATION |         |                                                                                                                                                                                                                      |                   |
| Title:                     |         |                                                                                                                                                                                                                      |                   |
| Identification             | 1a      | Identify the report as a protocol of a systematic review                                                                                                                                                             | 1                 |
| Update                     | 1b      | If the protocol is for an update of a previous systematic review, identify as such                                                                                                                                   | NA                |
| Registration               | 2       | If registered, provide the name of the registry (such as PROSPERO) and registration number                                                                                                                           | 2                 |
| Authors:                   |         |                                                                                                                                                                                                                      |                   |
| Contact                    | 3a      | Provide name, institutional affiliation, e-mail address of all protocol authors; provide physical mailing address of corresponding author                                                                            | 1                 |
| Contributions              | 3b      | Describe contributions of protocol authors and identify the guarantor of the review                                                                                                                                  | 16                |
| Amendments                 | 4       | If the protocol represents an amendment of a previously completed or published protocol, identify as such and list changes; otherwise, state plan for documenting important protocol amendments                      | NA                |
| Support:                   |         |                                                                                                                                                                                                                      |                   |
| Sources                    | 5a      | Indicate sources of financial or other support for the review                                                                                                                                                        | 16                |
| Sponsor                    | 5b      | Provide name for the review funder and/or sponsor                                                                                                                                                                    | NA                |
| Role of sponsor or funder  | 5c      | Describe roles of funder(s), sponsor(s), and/or institution(s), if any, in developing the protocol                                                                                                                   | NA                |
| INTRODUCTION               |         |                                                                                                                                                                                                                      |                   |
| Rationale                  | 6       | Describe the rationale for the review in the context of what is already known                                                                                                                                        | 4-5               |
| Objectives                 | 7       | Provide an explicit statement of the question(s) the review will address with reference to participants, interventions, comparators, and outcomes (PICO)                                                             | 6                 |
| METHODS                    |         |                                                                                                                                                                                                                      |                   |
| Eligibility criteria       | 8       | Specify the study characteristics (such as PICO, study design, setting, time frame) and report characteristics years considered, language, publication status) to be used as criteria for eligibility for the review | 7                 |
| Information sources        | 9       | Describe all intended information sources (such as electronic databases, contact with study authors,                                                                                                                 | 8                 |

|                                    |     |                                                                                                                                                                                                                                                  |       |
|------------------------------------|-----|--------------------------------------------------------------------------------------------------------------------------------------------------------------------------------------------------------------------------------------------------|-------|
|                                    |     | trial registers or other grey literature sources) with planned dates of coverage                                                                                                                                                                 |       |
| Search strategy                    | 10  | Present draft of search strategy to be used for at least one electronic database, including planned limits, such that it could be repeated                                                                                                       | 8-9   |
| Study records:                     |     |                                                                                                                                                                                                                                                  |       |
| Data management                    | 11a | Describe the mechanism(s) that will be used to manage records and data throughout the review                                                                                                                                                     | 9     |
| Selection process                  | 11b | State the process that will be used for selecting studies (such as two independent reviewers) through each phase of the review (that is, screening, eligibility and inclusion in meta-analysis)                                                  | 9     |
| Data collection process            | 11c | Describe planned method of extracting data from reports (such as piloting forms, done independently, in duplicate), any processes for obtaining and confirming data from investigators                                                           | 9-10  |
| Data items                         | 12  | List and define all variables for which data will be sought (such as PICO items, funding sources), any pre-planned data assumptions and simplifications                                                                                          | 10    |
| Outcomes and prioritization        | 13  | List and define all outcomes for which data will be sought, including prioritization of main and additional outcomes, with rationale                                                                                                             | NA    |
| Risk of bias in individual studies | 14  | Describe anticipated methods for assessing risk of bias of individual studies, including whether this will be done at the outcome or study level, or both; state how this information will be used in data synthesis                             | 10-11 |
| Data synthesis                     | 15a | Describe criteria under which study data will be quantitatively synthesised                                                                                                                                                                      | NA    |
|                                    | 15b | If data are appropriate for quantitative synthesis, describe planned summary measures, methods of handling data and methods of combining data from studies, including any planned exploration of consistency (such as $I^2$ , Kendall's $\tau$ ) | NA    |
|                                    | 15c | Describe any proposed additional analyses (such as sensitivity or subgroup analyses, meta-regression)                                                                                                                                            | NA    |
|                                    | 15d | If quantitative synthesis is not appropriate, describe the type of summary planned                                                                                                                                                               | 11    |
| Meta-bias(es)                      | 16  | Specify any planned assessment of meta-bias(es) (such as publication bias across studies, selective reporting within studies)                                                                                                                    | NA    |
| Confidence in cumulative evidence  | 17  | Describe how the strength of the body of evidence will be assessed (such as GRADE)                                                                                                                                                               | 10    |
